# Supplementary material for: Highly luminescent dual mode rare-earth nanorod assisted multi-stage excitable security ink for anti-counterfeiting applications
Source: Royal Society of Chemistry journal article supplement (doi:10.1039/c4tc02065k), 2014-01-01
Supplement: c4tc02065k1.pdf [file c4tc02065k1.pdf]

## **Electronic Supplementary Information<sup>†</sup>(ESI)**

### **Highly luminescent dual mode rare-earth nanorod assisted multi-stage excitable security ink for anti-counterfeiting applications**

Pawan Kumar, Jaya Dwivedi and Bipin Kumar Gupta\*

Luminescent Materials and Devices Group, Materials Physics and Engineering Division,  
CSIR-National Physical Laboratory, Dr K. S. Krishnan Road, New Delhi-110012, India

\*Corresponding authors E-mail: [bipinbhu@yahoo.com](mailto:bipinbhu@yahoo.com)

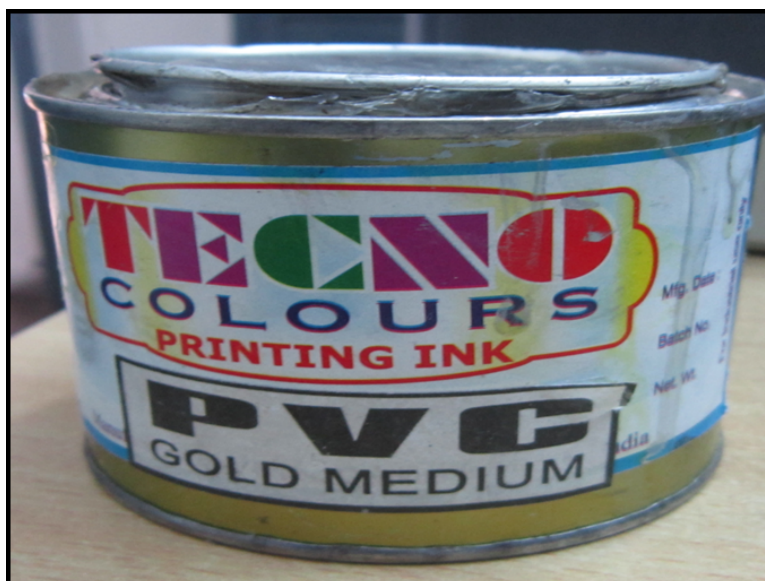

**Fig. S1** Commercially available PVC gold medium used for ink preparation. The use of PVC gold medium is well known for screen printing which is major advantage in present case to choose PVC gold medium.

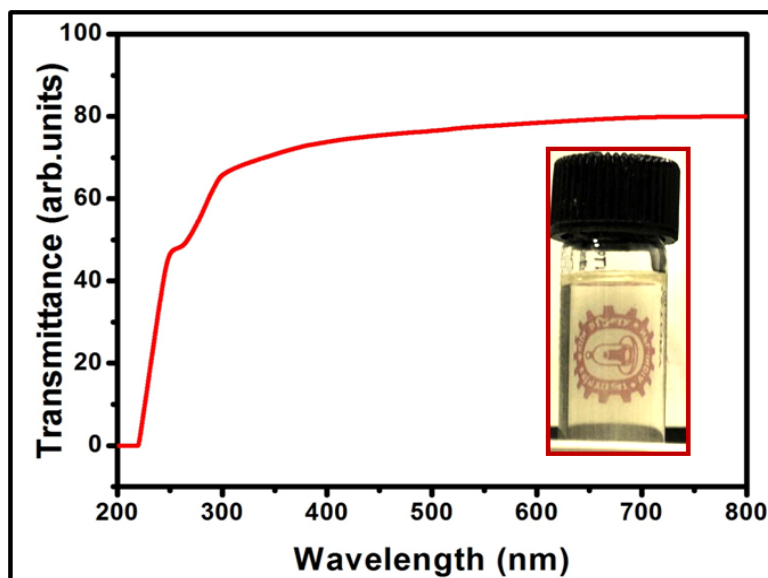

**Fig. S2** Transmittance spectrum of  $\text{Y}_2\text{O}_3:\text{Yb}^{3+}, \text{Er}^{3+}$  nanorods in PVC gold medium and inset shows the transparent solution of  $\text{Y}_2\text{O}_3:\text{Yb}^{3+}, \text{Er}^{3+}$  nanorods dispersed in PVC gold medium which was highly stable for several hours with colloidal transparency  $\sim 81\%$ .

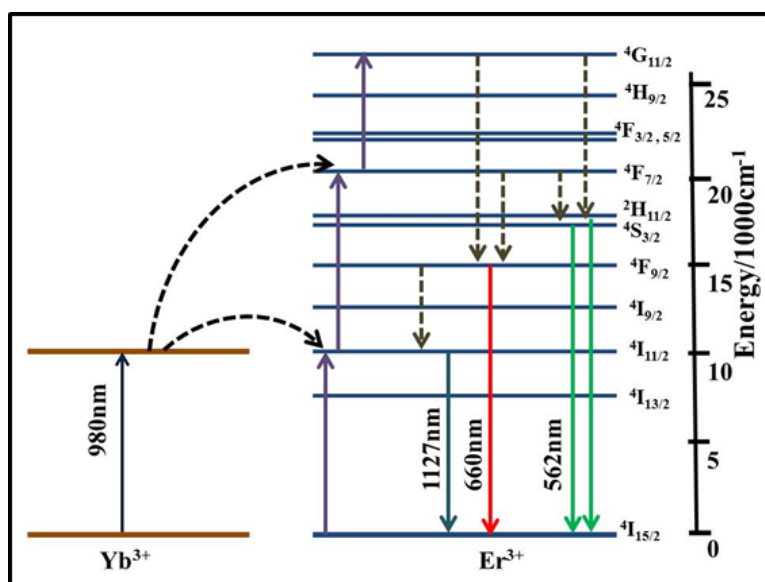

**Fig. S3** Proposed energy level diagram for upconversion mechanism of  $\text{Y}_2\text{O}_3:\text{Yb}^{3+}, \text{Er}^{3+}$  nanorods.

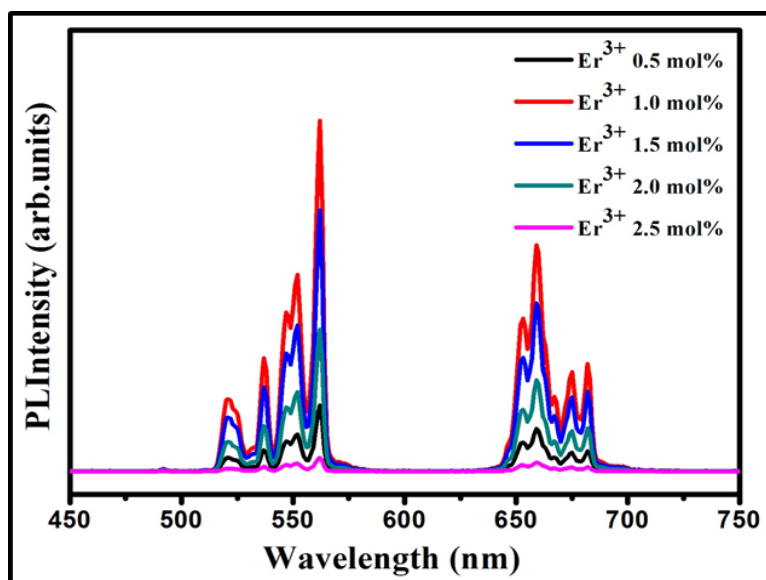

**Fig. S4** Variation of PL intensity with the  $\text{Er}^{3+}$  concentration at fixed concentration of  $\text{Yb}^{3+}$  (2 mol%) in  $\text{Y}_2\text{O}_3:\text{Yb}^{3+}, \text{Er}^{3+}$  nanorods.

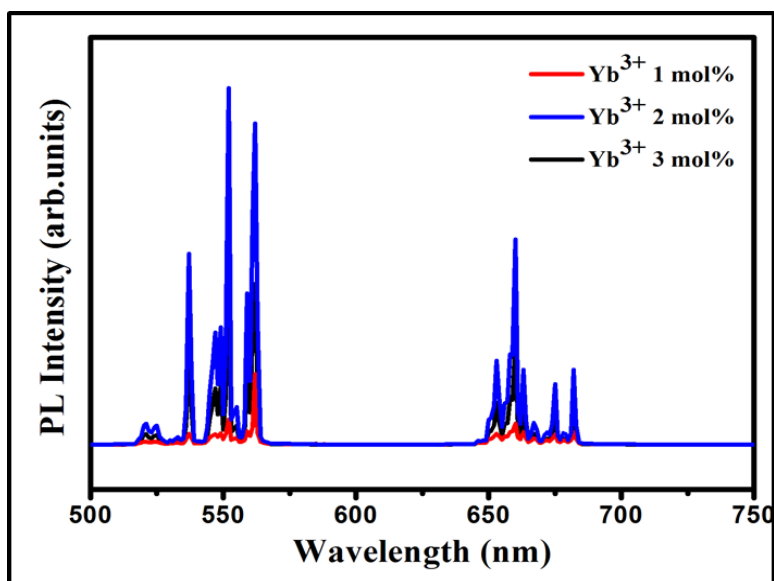

**Fig. S5** Variation of PL intensity with the  $\text{Yb}^{3+}$  concentration at fixed concentration of  $\text{Er}^{3+}$  (1 mol%) in  $\text{Y}_2\text{O}_3:\text{Yb}^{3+}, \text{Er}^{3+}$  nanorods.

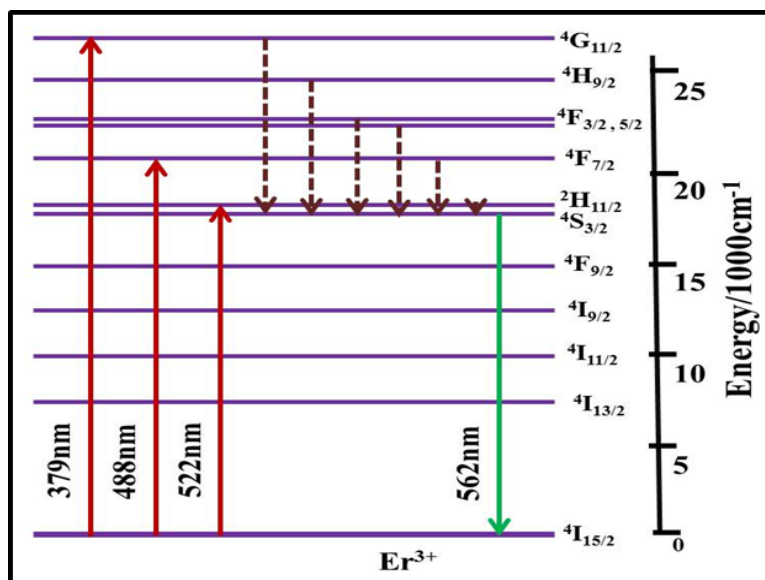

**Fig. S6** Proposed energy level diagram for down-shift mechanism of  $\text{Y}_2\text{O}_3:\text{Yb}^{3+}, \text{Er}^{3+}$  nanorods.

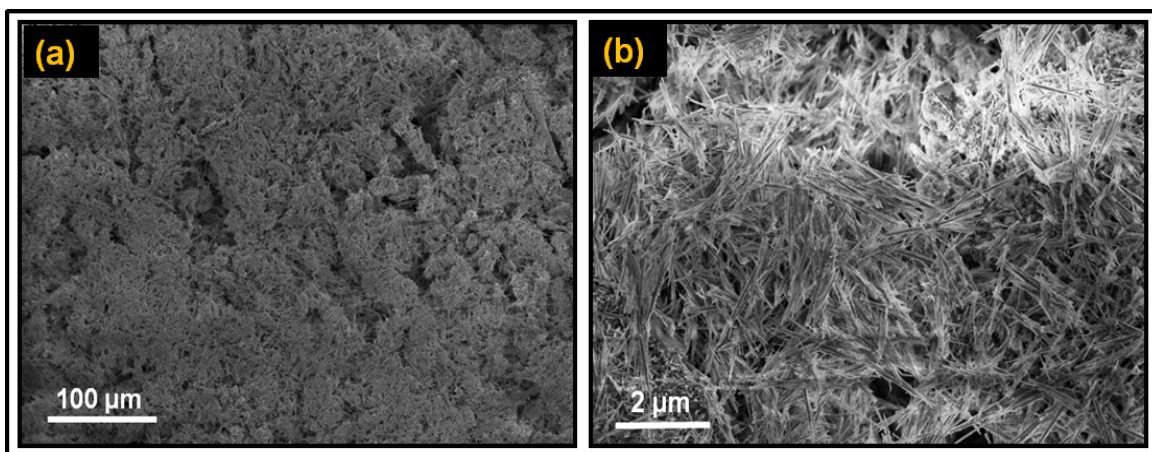

**Fig. S7** (a) and (b) shows the SEM micrographs of  $\text{Y}(\text{OH})_3:\text{Yb}^{3+}, \text{Er}^{3+}$  nanorods heated at  $185^\circ\text{C}$  for 10 hours, where (b) is magnified version of Fig. (a). The micrographs are clearly demonstrating the nanorods grow at lower temperature with hexa-hydroxy formation phase.

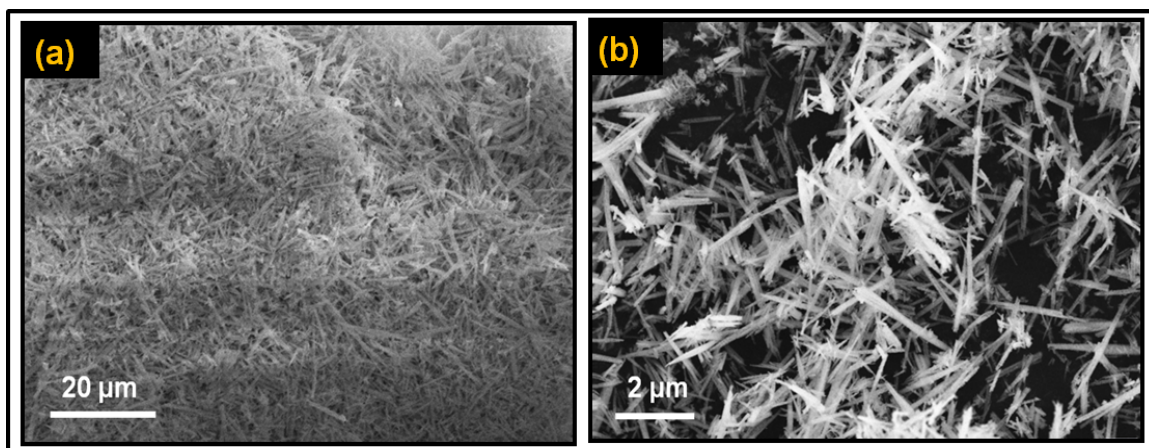

**Fig. S8** (a) and (b) shows the SEM micrographs of  $\text{Y}_2\text{O}_3:\text{Yb}^{3+}, \text{Er}^{3+}$  nanorods heated at  $1000^\circ\text{C}$  for 3 hours, where (b) is magnified version of Fig. (a)

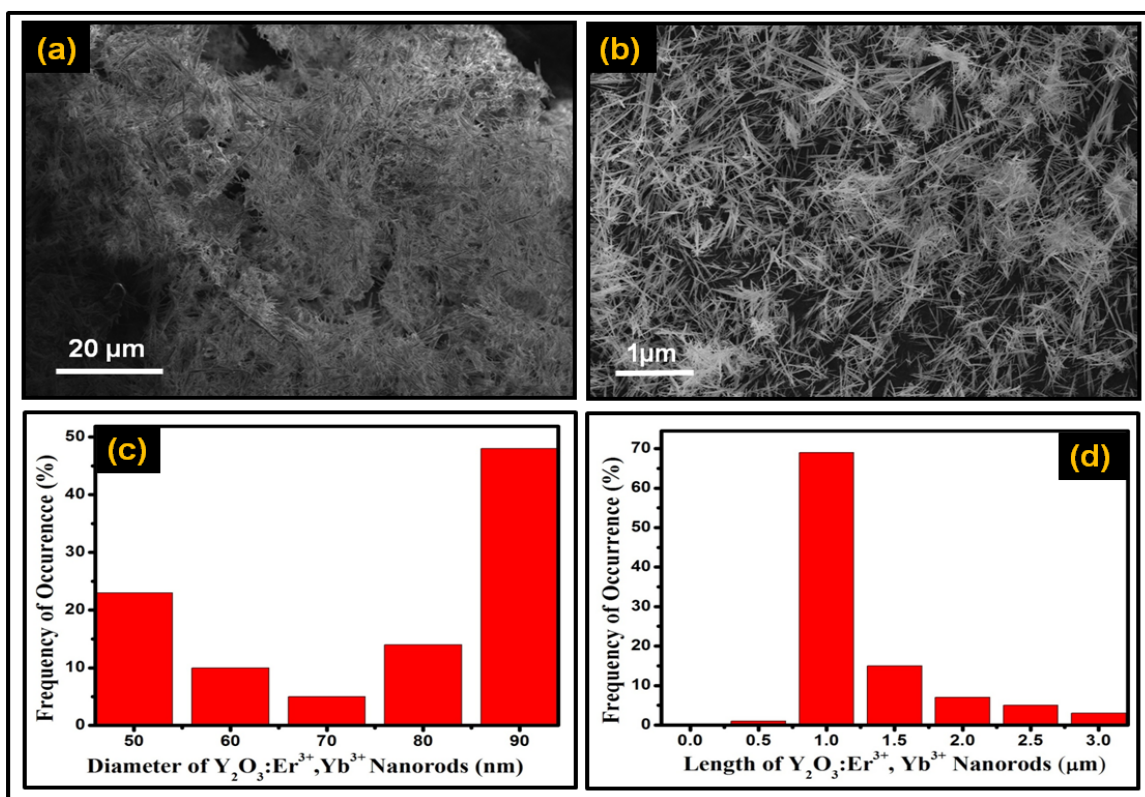

**Fig. S9** (a) and (b) shows the SEM micrographs of  $\text{Y}_2\text{O}_3:\text{Yb}^{3+}, \text{Er}^{3+}$  nanorods heated at  $1000^\circ\text{C}$  for 6 hours, where (b) is magnified version of Fig. (a), which clearly demonstrates the high dense

structure of nanorods with almost uniform diameter. Fig (c) and (d) demonstrate the statistic histogram distribution for diameter and length of  $\text{Y}_2\text{O}_3:\text{Yb}^{3+}, \text{Er}^{3+}$  nanorods respectively.

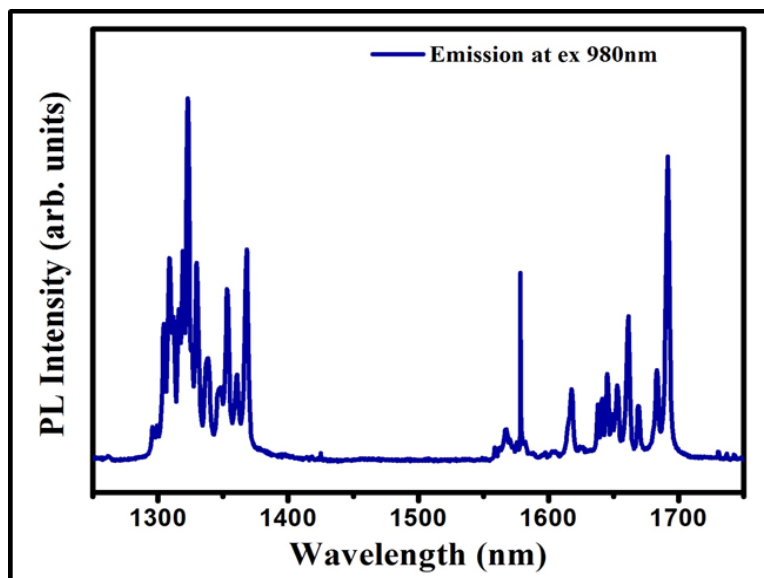

**Fig. S10** Emission spectrum at excitation 980 nm of  $\text{Y}_2\text{O}_3:\text{Yb}^{3+}, \text{Er}^{3+}$  nanorods heated at  $1000^\circ\text{C}$ .

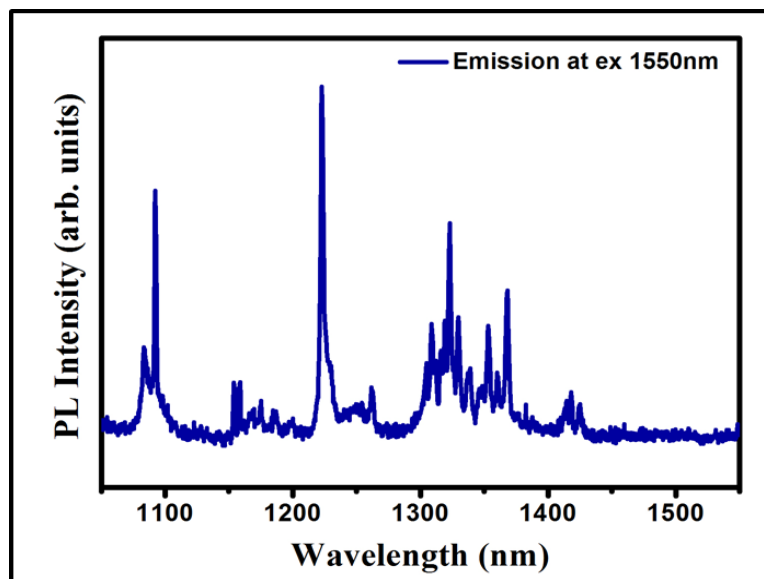

**Fig. S11** Emission spectrum at excitation 1550 nm of  $\text{Y}_2\text{O}_3:\text{Yb}^{3+}, \text{Er}^{3+}$  nanorods heated at  $1000^\circ\text{C}$ .



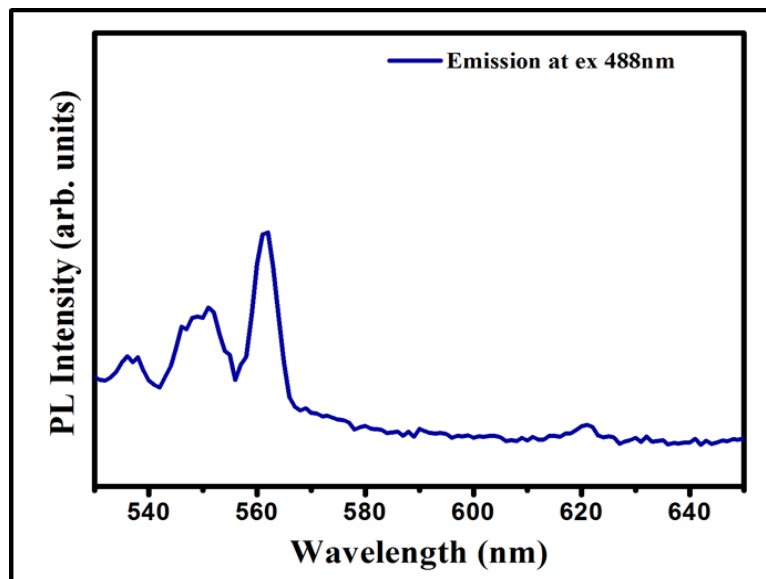

**Fig. S12** Emission spectrum at excitation 488 nm of Y<sub>2</sub>O<sub>3</sub>:Yb<sup>3+</sup>, Er<sup>3+</sup> nanorods heated at 1000°C.

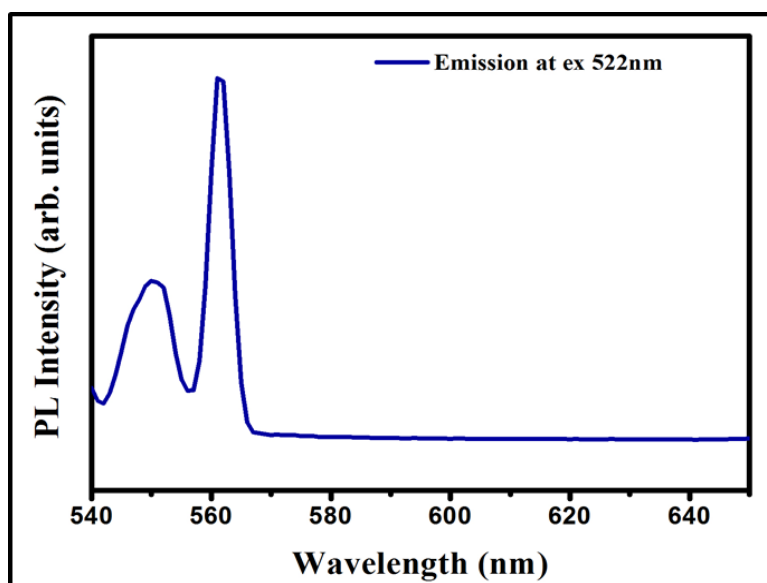

**Fig. S13** Emission spectrum at excitation 522 nm wavelength of Y<sub>2</sub>O<sub>3</sub>:Yb<sup>3+</sup>, Er<sup>3+</sup> nanorods heated at 1000°C.

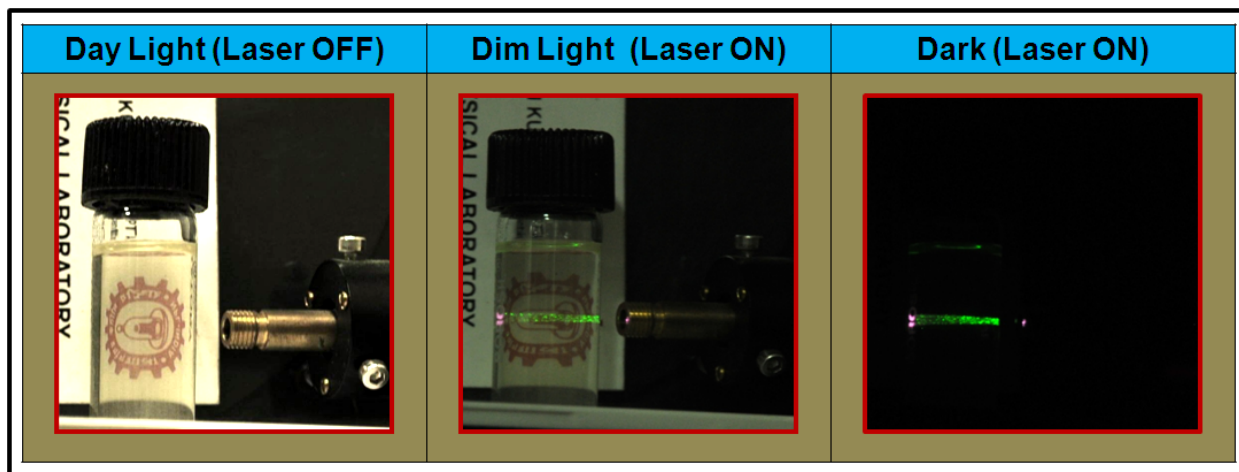

**Fig. S14** Typical photographs of  $\text{Y}_2\text{O}_3:\text{Yb}^{3+}, \text{Er}^{3+}$  nanorods dispersed in PVC gold medium in different condition using 980 nm diode laser with beam diameter 3mm.

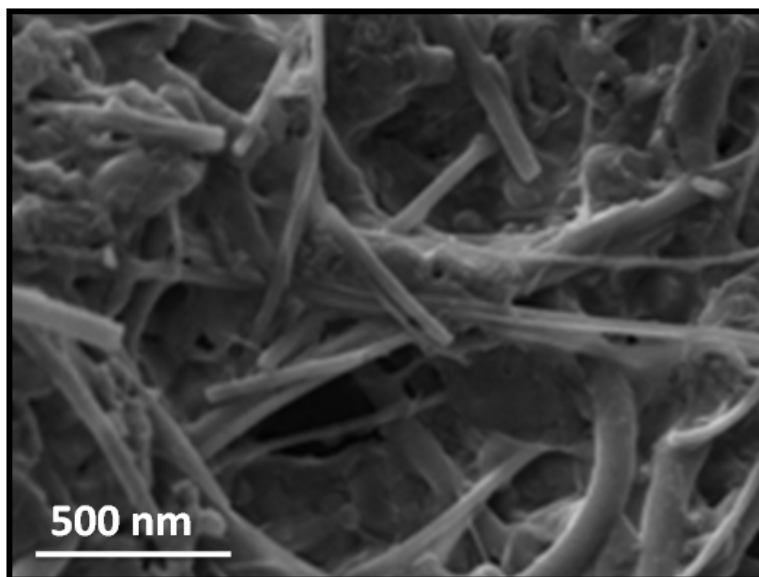

**Fig. S15** SEM image of  $\text{Y}_2\text{O}_3:\text{Yb}^{3+}, \text{Er}^{3+}$  nanorods after its dispersion into PVC gold medium. The SEM result clearly exhibits infilling of nanorods in PVC gold medium matrix.
